# Supplementary material for: Functional association of NR4A3 downregulation with impaired differentiation in myeloid leukemogenesis
Source: Springer Nature journal article supplement (doi:10.1007/s00277-022-04961-1), 2022-08-30
Supplement: MOESM2 [file 23434070]

## MYELOID CELL DIFFERENTIATION

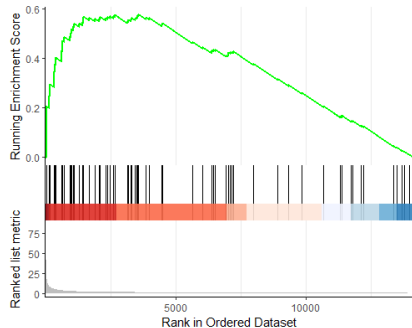

| enrichmentScore | NES      | pvalue      |
|-----------------|----------|-------------|
| 0.5766919       | 1.796657 | 0.002522233 |

## ERYTHROCYTE DIFFERENTIATION

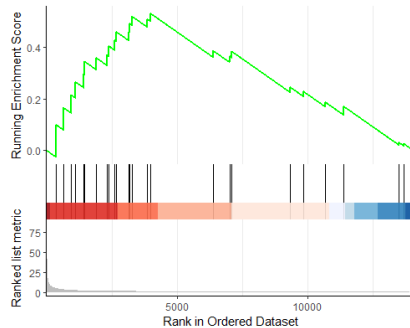

| enrichmentScore | NES    | pvalue     |
|-----------------|--------|------------|
| 0.5306659       | 1.4996 | 0.09897959 |
